1 **A tiger in the Upper Midwest: Surveillance and genetic data support the**  
2 **introduction and establishment of *Aedes albopictus* in Iowa, USA**

3

4 David R. Hall<sup>1</sup>, Ryan E. Tokarz<sup>1,2</sup>, Eleanor N. Field<sup>1</sup>, Ryan C. Smith<sup>1\*</sup>

5

6 <sup>1</sup>Department of Entomology, Iowa State University, Ames, Iowa, USA

7 <sup>2</sup>Current address: Department of International and Global Studies, Mercer University,  
8 Macon, Georgia, USA

9 \*Corresponding author: [smithr@iastate.edu](mailto:smithr@iastate.edu)

## 10 **Abstract**

11 *Aedes albopictus* is a competent vector of several arboviruses that has spread throughout  
12 the United States over the last three decades after it was initially detected in Texas in  
13 1985. With the emergence of Zika virus in the Americas in 2015-2016 and an increased  
14 need to better understand the current distributions of *Ae. albopictus* in the US, we initiated  
15 surveillance efforts to determine the abundance of invasive *Aedes* species in Iowa. Here,  
16 we describe the resulting surveillance efforts from 2016-2020 in which we detect stable  
17 and persistent populations of *Aedes albopictus* in three Iowa counties. Based on temporal  
18 patterns in abundance and genetic analysis of mitochondrial DNA haplotypes between  
19 years, our data support that populations of *Ae. albopictus* are overwintering and have  
20 likely become established in the state. In addition, the localization of *Ae. albopictus*  
21 predominantly in areas of urbanization and noticeable absence in rural areas suggests  
22 that these ecological factors may represent potential barriers to their further spread and  
23 contribute to overwintering success. Together, these data document the establishment of  
24 *Ae. albopictus* in Iowa and their expansion into the Upper Midwest, where freezing winter  
25 temperatures were previously believed to limit their spread. With increasing globalization,  
26 urbanization, and rising temperatures associated with global warming, the range of  
27 invasive arthropod vectors, such as *Ae. albopictus*, is expected to only further expand,  
28 creating increased risks for vector-borne disease.

## 29 **Introduction**

30 *Aedes albopictus* is an invasive mosquito species that in recent decades has spread  
31 across multiple continents predominantly through global trade [1–4]. With the first report  
32 of its establishment in the United States (US) in Texas in 1985 [5], its range has  
33 continually expanded to more than 26 states, gradually spreading northward and  
34 westward across the US [6–8] with likely further expansion fueled by climate change and  
35 increasing urbanization [3]. With anthropophilic feeding behavior [4,9] and as a competent  
36 vector of at least 26 mosquito-borne arboviruses [10], the introduction of *Ae. albopictus*  
37 into new locations in the US raises a significant public health concern.

38 With *Ae. albopictus* as a competent vector of Zika virus (ZIKV) [11,12], the emergence of  
39 ZIKV in the Americas in 2015 and 2016 created a critical need to better understand the  
40 distributions of *Ae. albopictus* in the US in order to determine the potential risks for ZIKV  
41 transmission. Previous studies have described the detection of *Ae. albopictus* populations  
42 across the Midwest [7,8,13–17]. This includes Iowa, which has seen sporadic detections  
43 of *Ae. albopictus* that likely represent rare and unsuccessful introduction events [17].  
44 However, with established populations of *Ae. albopictus* in the neighboring states of  
45 Missouri [7,8,13] and Illinois [7,8,16], there is a high likelihood of further *Ae. albopictus*  
46 introduction events and potential invasion with modeling suggesting that Iowa is within  
47 this species' predicted range [18]. Initial targeted surveillance in 2016 along the southern  
48 Iowa border failed to detect *Ae. albopictus* [19], yet with sampling only over a single year,  
49 there may not have been adequate trapping efforts to identify low-density populations.

50 In this study, we describe our continued monitoring of mosquito populations in Iowa  
51 through targeted surveillance efforts focusing on invasive *Aedes* species. Expanding on  
52 our initial efforts [19], we used a trapping network consisting of BG sentinel and Gravid  
53 *Aedes* traps from 2017 to 2020 to monitor mosquito populations in a total of 25 counties  
54 over a five year period (2016 to 2020). Through these efforts, we document the detection  
55 and likely establishment of *Ae. albopictus* in three Iowa counties. In addition, we provide  
56 evidence of their intra-county movement and the ecological variables that define their  
57 presence and absence, elucidating the potential ecological barriers that have thus far  
58 prevented their further spread to adjacent counties. Genetic analysis confirms the

59 subsistence of genetic haplotypes between years, supporting the establishment of *Ae.*  
60 *albopictus* in each of the respective counties in which it has been detected, providing  
61 insight into the origins of their introduction.

## 62 **Methods**

### 63 **Mosquito Surveillance**

64 Targeted mosquito trapping efforts were performed by Iowa State University personnel or  
65 in collaboration with local public health departments between 2016 and 2020 from mid-  
66 May through October when mosquitoes are most active in Iowa. While initial efforts in  
67 2016 relied on the use of BG Sentinel and CDC light traps [19], trapping from 2017-2020  
68 utilized BG Sentinel 2 (BG) traps and Gravid *Aedes* Traps (GATs) (Biogents,  
69 Regensburg, Germany). These traps have proven to be highly effective in capturing  
70 *Aedes albopictus* and other container-breeding *Stegomyia* specimens [20–24], with the  
71 relatively low cost and little maintenance of the GATs enabling broader coverage with  
72 each respective county. BG traps were used without a carbon dioxide source, relying on  
73 human scent lures (BG-Lure, Biogents), while the GATs were equipped with sticky cards  
74 to enable mosquito collections.

75 Following our efforts in 2016 which targeted 9 of the 10 counties along Iowa's southern  
76 border [19], we expanded our trapping efforts in 2017 to incorporate all eastern border  
77 counties along the Mississippi River and counties with more densely populated cities.  
78 These counties were chosen based on their proximity to Missouri and Illinois which have  
79 established populations of *Ae. albopictus* [7,8,13,16] and that have the highest potential  
80 for introduction via shipping/transport into more densely populated areas. In subsequent  
81 years (2018-2020), data from the previous trapping efforts allowed for more focused  
82 surveillance, reducing the overall number of participating counties. Trapping efforts were  
83 continued in each county where *Ae. albopictus* was detected, as well as in counties that  
84 represented potential sites of introduction or spread from adjacent positive counties.

### 85 **Mosquito Sample Processing and Identification**

86 Mosquito samples were collected three times a week from BG Sentinel traps, while GATs  
87 were collected on a weekly basis. Samples were either transported directly or shipped to  
88 Iowa State where mosquitoes were identified to species using morphological

89 characteristics and taxonomic keys [25]. Corresponding data were recorded according to  
90 date, trap location, and trap type. *Ae. albopictus* samples were separated into site/date-  
91 specific vials and stored in an ultra-low temperature freezer at -80°C for later genetic  
92 analysis.

### 93 **Geographic and Land Cover Analysis**

94 The latitude and longitude coordinates of all trap locations were recorded and utilized to  
95 plot trapping locations using QGIS version 3.14.1. A Landsat-based, 30-meter resolution  
96 land cover layer, clipped to reflect our study area, was obtained from the Multi-Resolution  
97 Land Characteristics Consortium (MRLC) National Land Cover Database (NLCD) [26]  
98 which served as the base map and the source of all land cover output. Land cover  
99 analysis was performed for the two counties in southeast Iowa (Lee and Des Moines  
100 counties) which displayed widespread presence of *Ae. albopictus*. Trapping site locations  
101 within these counties were examined in QGIS using a 500 meters radius around each  
102 surveillance site, with the zonal histogram tool to list pixel counts of each unique land  
103 cover value within that radius (buffer layer). This distance was chosen based on the  
104 limited flight range of *Ae. albopictus*, which typically does not travel far from its site of  
105 origin with a maximum flight range of ~500m [27–29]. Based on pixel numbers  
106 corresponding to each land cover feature, the percent land cover was calculated for each  
107 site and used to compare between locations where *Ae. albopictus* was present or absent.

### 108 **Genetic Analysis**

109 *Ae. albopictus* samples collected from site locations between 2017 and 2018 in each of  
110 the three positive Iowa counties were examined by genetic analysis. A total of 165  
111 samples were processed using the Marriott DNA extraction procedure [30–32] to isolate  
112 genomic DNA which was used as a template for PCR genotyping. Similar to other studies  
113 that have examined *Ae. albopictus* genetic haplotypes [16,33], a fragment of the  
114 mitochondrial cytochrome c oxidase subunit 1 was targeted with the following primers:  
115 2027F (5'-CCC GTA TTA GCC GGA GCT AT-3') and 2886R (5'-ATG GGG AAA GAA  
116 GGA GTT CG-3'). PCR was performed using DreamTaq Green DNA Polymerase  
117 (Thermo Fisher Scientific) under the following conditions: initial denaturation 94°C, 3 min;  
118 denaturation 94°C, 30 sec; annealing 55°C, 30 sec; extension 72°C, 1 min for 35 cycles;

119 and a final extension 72°C, 6 min. PCR products were examined by electrophoresis on a  
120 1% agarose gel, excised, and recovered using a Zymoclean Gel DNA Recovery Kit (Zymo  
121 Research). Resulting DNA was cloned into a pJET 1.2/blunt cloning vector using the  
122 CloneJET PCR Cloning Kit (Thermo Fisher Scientific), and subsequently transformed into  
123 DH5-alpha competent *E. coli* (New England Biolabs). Bacteria were plated on LB agar  
124 plates with a 100 µg/ml ampicillin concentration and incubated overnight at 37°C to select  
125 for successfully transformed colonies. Individual colonies were randomly chosen from the  
126 selection plates, suspended in 3 ml of LB broth and cultured overnight in a 37°C shaker  
127 at 215 RPM. Plasmid DNA was isolated using the GeneJet Plasmid Miniprep Kit (Thermo  
128 Fisher Scientific), with the presence of an insert validated by *Bgl*II digests and gel  
129 electrophoresis. Sanger sequencing of the resulting samples was conducted by the Iowa  
130 State University DNA Facility.

131 DNA sequencing data was aligned and edited manually using BioEdit version 7.0.5.3. To  
132 minimize the possibility of polymerase error, at least 3 sequences from each individual  
133 sample were combined to create a consensus sequence for each sample. Any unique  
134 sequences were confirmed by the additional amplification using Phusion High-Fidelity  
135 DNA Polymerase (Thermo Fisher Scientific) followed by cloning and sequencing using  
136 the above methods. DNA from individual mosquito samples were grouped into haplotypes  
137 where each haplotype represents a unique sequence, and the number of polymorphic  
138 sites, haplotype diversity ( $Hd$ ), and nucleotide diversity ( $\pi$ ) were calculated using DnaSP  
139 (version 6.12.03) [16,33,34]. A haplotype network was created in PopART [35] using the  
140 median-joining network method [36] to visualize genetic relationships between  
141 haplotypes and to display differences in population structure between sites [16].

## 142 **Results**

### 143 **Mosquito surveillance and detection of *Ae. albopictus* in Iowa**

144 To determine if the invasive mosquito species, *Ae. aegypti* and *Ae. albopictus*, could be  
145 found in the state of Iowa, we performed targeted mosquito surveillance in a total of 25  
146 counties from 2016 to 2020 (Figure 1A, Table S1, Table S2). After initial surveillance  
147 efforts along the southern border of the state in 2016 [19], we extended our trapping  
148 efforts from 2017-2020 to more densely populated counties and to those bordering the

149 Mississippi River (Figure 1A, Table S1, Table S2). Although *Ae. aegypti* and *Ae.*  
150 *albopictus* were not detected in 2016 [19], a total of 432 *Ae. albopictus* were collected in  
151 2017 from three Iowa counties (Polk, Lee, and Des Moines) (Figure 1A and 1B). In  
152 subsequent years (2018 to 2020), *Ae. albopictus* were similarly detected in each of the  
153 same three counties in increased numbers, reaching a high of 1,315 *Ae. albopictus*  
154 detected in 2020 (Figure 1B). From 2017 to 2020, a total of 3,700 *Ae. albopictus* were  
155 collected, with Lee County displaying the highest total of *Ae. albopictus* amongst the three  
156 counties (Figure 1C) and consistently producing the highest number of *Ae. albopictus*  
157 between years (Figure 1D). Together, these data suggest that in recent years *Ae.*  
158 *albopictus* have been introduced into the state, and have potentially become established  
159 in three Iowa counties.

#### 160 ***Ae. albopictus* population dynamics support their ability to overwinter in Iowa**

161 To provide further support that *Ae. albopictus* have become established in each of the  
162 three counties, we examined *Ae. albopictus* weekly numbers and overall contributions to  
163 trapping yields within each of the mosquito trapping seasons from 2016-2020 in counties  
164 for which *Ae. albopictus* were detected (Figure 2). Across counties, *Ae. albopictus*  
165 populations reached peak abundance in late summer (late August, early September;  
166 approximately weeks 35 and 36), followed by sharp declines in abundance by early  
167 October (week 40) (Figure 2). For Polk County in central Iowa, *Ae. albopictus* was first  
168 detected in week 31 (early August) in 2017, yet in subsequent years (2018-2020) were  
169 consistently identified in mid-June (weeks 24 and 25; Figure 2A). Moreover, *Ae.*  
170 *albopictus* represented a much larger percentage of overall trap yields between 2018-  
171 2020 when compared to 2017 (Figure 2B), suggesting that their earlier abundance and  
172 higher proportion in the collected samples are indicative of their potential establishment.

173 Similar patterns of *Ae. albopictus* abundance were also recorded in the southeastern  
174 portion of the state in Des Moines and Lee counties (Figure 2). For Des Moines County,  
175 the first detection of *Ae. albopictus* in 2017 occurred in week 30 (late July), while they  
176 were regularly detected in June (weeks 23-26) in subsequent years (2017-2020; Figure  
177 2C). Although sites in Des Moines County displayed some variability between trap types,  
178 *Ae. albopictus* comprised between ~10-40% of the overall number of mosquitoes

179 collected in the county (Figure 2D). Lee County recorded the earliest detection of *Ae.*  
180 *albopictus* in 2017, with the first samples identified in week 28 (mid-July). In the years  
181 following (2018-2020), *Ae. albopictus* were found as early as week 21 (late-May; Figure  
182 2E). Aside from 2016 when *Ae. albopictus* were not detected in our initial trapping efforts  
183 [19], *Ae. albopictus* represented ~34% of the total trap yields when averaged across years  
184 and trap types (Figure 2F). While we account for some yearly variation in occurrence and  
185 overall abundance, these data provide further support for the overwintering and  
186 establishment of *Ae. albopictus* in multiple Iowa counties.

### 187 **Influence of landscape ecology on *Ae. albopictus* abundance**

188 To determine if landscape ecology influences the presence of *Ae. albopictus* in Iowa, we  
189 looked to more closely examine the trapping site locations in each of the *Ae. albopictus*-  
190 positive counties. Trapping efforts in Polk County consisted of only a single site in close  
191 proximity to a facility involved in tire transport, with surrounding areas serving as an ideal  
192 habitat for *Ae. albopictus* (abundant breeding sites, tree cover, access to diverse hosts;  
193 Figure S1). Additional focused trapping efforts (BGs, GATs) were not performed at other  
194 locations in Polk County during this study. However, non-targeted surveillance involved  
195 with our West Nile virus surveillance program using other trap types (New Jersey Light  
196 Traps and Frommer Updraft Gravid Traps) have detected low numbers of *Ae. albopictus*  
197 in 2019 and 2020 at nearby locations in Polk County (Figure S2). The detection of *Ae.*  
198 *albopictus* in these suburban environments at locations that have been continuously  
199 trapped since 2016, suggests that *Ae. albopictus* have likely dispersed greater than 3  
200 miles from their presumed point of introduction in recent years, providing further support  
201 for the ability of *Ae. albopictus* to overwinter in Polk County.

202 In contrast to the likely introduction of *Ae. albopictus* in Polk County associated with tire  
203 transport, there were no obvious mechanisms for the introduction of *Ae. albopictus* in Des  
204 Moines and Lee counties. As a result, the multiple trapping locations in Des Moines and  
205 Lee counties provided a better opportunity to determine the influence of landscape  
206 ecology on the presence or absence of *Ae. albopictus* (Figure 3). To address this  
207 question, we performed comparative land cover analysis on a total of 37 trapping site  
208 locations for which we defined each site for the presence/absence of *Ae. albopictus*



209 (Figure 3, Table S3). A total of 22 sites where *Ae. albopictus* were detected every year  
210 were considered “positive”, while the six sites for which *Ae. albopictus* were never found  
211 were considered “negative” (Table S3). Nine other sites where *Ae. albopictus* were  
212 identified but not collected every year were defined as “detected” (Table S3), suggesting  
213 that these sites represent new introductions that may or may not support established  
214 populations. Each of these trapping sites were mapped to their respective locations in  
215 Des Moines and Lee counties (Figure 3A), and the landscape ecology of “positive”,  
216 “negative”, and “detected” sites were compared (Figure 3B). We identified that areas of  
217 low-density development were significantly correlated with the presence of *Ae. albopictus*,  
218 while the percentage of agricultural areas were negatively associated with the presence  
219 of *Ae. albopictus* (Figure 3B). These data are supported by the spatial locations of the  
220 trapping site locations, where sites within urbanized areas were predominantly positive,  
221 while those located in more rural areas were typically negative (Figure 3A). This  
222 corresponds with the preferred habitat of *Ae. albopictus* which is most commonly  
223 associated with urban and suburban environments [37,38].

224 Furthermore, our trapping data provide support for the expansion of *Ae. albopictus* in both  
225 Des Moines and Lee counties. The presence of several sites for which *Ae. albopictus*,  
226 were detected, but not necessarily established, supports the movement of this mosquito  
227 species into new areas. This is further evidenced by the presence of *Ae. albopictus* in  
228 Keokuk (Lee County; Figure 3A) in 2018, where previous trapping efforts in 2016 [19] and  
229 2017 suggested that these mosquito species were noticeably absent. This contrasts  
230 surveillance in Ft. Madison (Lee County; Figure 3A) where *Ae. albopictus* have been  
231 detected at every site since 2017 (Figure 3A, Table S3). With these two cities separated  
232 by ~16 miles, these data imply that the distribution of *Ae. albopictus* in Lee County may  
233 be continually expanding into new locations.

### 234 **Genetic haplotype analysis identifies likely sources of introduction and supports** 235 **overwintering of *Ae. albopictus* in Iowa**

236 To better understand the origins of the *Ae. albopictus* collected in each of the three  
237 positive counties, DNA was isolated from a total of 165 individual samples and sequences  
238 of the mitochondrial CO1 gene were analyzed similarly to previous studies [16,33].

239 Sequence analysis resulted in the identification of 8 genetic haplotypes (Figure 4A, Table  
240 S4), distinguished by single nucleotide polymorphisms ranging between one to three  
241 nucleotides (Figure 4A, Table S5). The most abundant haplotypes, *hap\_1* and *hap\_3*, are  
242 distinguished by two nucleotides and were found in each of the three *Ae. albopictus*  
243 positive counties (Figure 4A). Both haplotypes represent common DNA haplotypes  
244 detected in other locations in the United States [16,33], southeast Asia [33,39], and  
245 Europe [33] (Table S4). Moreover, *hap\_2* and *hap\_3* were previously detected in Illinois  
246 [16] (Table S4), which due to its close proximity suggests that Illinois may serve as the  
247 likely origin and source for the introduction of *Ae. albopictus* in Iowa.

248 For each of the *Ae. albopictus* counties, three or more haplotypes were detected, with  
249 both Des Moines and Lee counties displaying a total of five haplotypes (Figure 4B). While  
250 the majority of samples in Polk and Lee counties represented a single haplotype, Des  
251 Moines County displayed the most diverse population with *hap\_1*, 2, and 3 comprising  
252 the majority of samples (Figure 4B). When samples were examined between years (2017  
253 and 2018), the predominant haplotype(s) were consistent between years in each *Ae.*  
254 *albopictus* positive county (Figure 4C), providing further support for the establishment of  
255 these populations in each of the respective counties.

### 256 ***Ae. albopictus* overwintering in below freezing winter isotherms**

257 Based on our surveillance data (Figure 2) and genetic analysis of DNA haplotypes (Figure  
258 4), our results provide a strong argument for the introduction and establishment of *Ae.*  
259 *albopictus* in Iowa. Since overwintering temperatures have largely been attributed to  
260 limiting the spread of *Ae. albopictus* in North America [40], we examined the average  
261 winter temperature (December, January, February) isotherms for Iowa (1981-2010). Each  
262 of the *Ae. albopictus*-positive counties have average winter temperatures below freezing,  
263 with Des Moines and Lee counties in the -3 to -4°C isotherm, and Polk County in the -4  
264 to -5°C isotherm (Figure 5A). While January temperatures (typically the coldest month)  
265 vary between years, temperatures ranged between -1 to -6°C in the *Ae. albopictus*-  
266 positive counties during our study period (Figure 5B). These low temperatures are  
267 traditionally considered to be not conducive to *Ae. albopictus* overwintering [18,40],  
268 suggesting that the *Ae. albopictus* populations in Iowa have been able to adapt to these

269 freezing temperatures or have found adequate insulated environments to survive the  
270 winter. With the potential that global warming may have promoted elevated winter  
271 temperatures that may increase the chances of *Ae. albopictus* overwintering in the state,  
272 we examined the 30-year average January temperatures from 1981-2010 and 1991-2020  
273 (Figure 5C). While Polk County displayed slightly warmer temperatures in recent years,  
274 temperatures in both Des Moines and Lee counties were  $\sim 0.5^{\circ}\text{C}$  cooler (Figure 5C),  
275 arguing that the recent expansion of *Ae. albopictus* into these areas is not the result of  
276 warmer winter temperatures.

## 277 Discussion

278 While limited detections of *Ae. albopictus* in Iowa (12 total from 1999-2016) have  
279 previously been described [17,41], these rare incidents were likely the result of isolated  
280 introduction events. However, with the introduction of Zika virus in the Americas in 2015-  
281 2016, there was an increased need to define the range of competent *Aedes* vectors  
282 throughout the US. Although our initial efforts in 2016 along the southern Iowa border did  
283 not detect *Ae. albopictus* [19], the results of our expanded surveillance efforts from 2017-  
284 2020 presented here describe the detection of more than 3,700 *Ae. albopictus* samples  
285 from three Iowa counties.

286 From these data, several lines of evidence support the establishment of *Ae. albopictus* in  
287 Iowa. This includes the consistent, early-season detection of *Ae. albopictus* in May and  
288 June, as well as the high percentage of the overall trapping yields for each of the three  
289 *Ae. albopictus*-positive counties. This is further validated by the occurrence of consistent  
290 mtDNA haplotypes between years, indicative of stable, genetic populations of *Ae.*  
291 *albopictus* that support mosquito overwintering.

292 While we cannot fully eliminate the possibility that new, yearly introductions may also  
293 contribute to the *Ae. albopictus* samples that were collected, the high number of individual  
294 mosquito samples collected for each *Ae. albopictus*-positive county makes this possibility  
295 unlikely. Although the primary site examined in Polk County is associated with tire  
296 transport, the surrounding areas are ideal *Ae. albopictus* habitat, with adequate tree  
297 cover, the presence of human and mammalian hosts, and an abundance of human-  
298 derived containers/tires that can serve as sites for oviposition that would support *Ae.*

299 *albopictus* in much greater density. Although no obvious mechanisms of introduction by  
300 tire transport have been determined for Des Moines and Lee counties, the proximity to  
301 the Mississippi River and interstate highways that support human-associated transport  
302 likely account for the large number of *Ae. albopictus* collected in both locations. However,  
303 the consistency between years and the representation of similar *Ae. albopictus* mtDNA  
304 haplotypes across each county suggest that these are stable populations, supporting that  
305 the overwintering and establishment of *Ae. albopictus* as the most likely cause for the  
306 mosquitoes collected during our study period.

307 The presumed establishment of *Ae. albopictus* in Iowa challenges previous studies that  
308 have suggested that *Ae. albopictus* populations rarely extend north of 40°N latitude [7,18],  
309 presumably due to freezing winter temperatures that limit the ability of *Ae. albopictus* to  
310 overwinter in North America [40,42]. With average winter temperatures below 0°C which  
311 have traditionally limited overwintering and the expansion of *Ae. albopictus* [42], the  
312 freezing winter conditions in Iowa have traditionally been viewed as a major limitation to  
313 sustaining overwintering populations [18,40]. However, the detection of stable  
314 populations of *Ae. albopictus* in regions of Iowa with average winter temperature ranging  
315 from -3 to -5°C argue that these mosquito populations have potentially adapted to survive  
316 these harsh winter conditions. This also raises questions if winter temperatures alone are  
317 responsible for this climactic barrier, where the presence of snow cover may also help  
318 insulate overwintering *Ae. albopictus* eggs to enhance their survival [43]. Therefore, the  
319 microclimate of overwintering eggs may have a larger influence on the overwintering  
320 survival of *Ae. albopictus*.

321 An additional consideration of winter temperatures is the importance of urban heat islands  
322 [44–46], which may provide differences in microclimate across an urban and suburban  
323 landscape that results in warmer winter temperatures [45,46], potentially improving *Ae.*  
324 *albopictus* overwintering survival [47]. This is supported by the importance of urbanized  
325 development on the consistent detection of *Ae. albopictus* in Des Moines and Lee  
326 counties, where the presence of more rural, agricultural environments had significant  
327 influence on the presence/absence of *Ae. albopictus*. Furthermore, our site in Polk County  
328 also resides in an urbanized environment. Therefore, these urban microenvironments

329 may provide increased “insulation” from the harsh winter temperatures that have been  
330 traditionally believed to serve as an ecological barrier for *Ae. albopictus* expansion. As a  
331 result, this would explain the higher density of *Ae. albopictus* collected in urban  
332 environments, and the low density or absence of *Ae. albopictus* collected in more natural  
333 or agricultural areas.

334 At present, it is unclear as to the exact timing of when *Ae. albopictus* were introduced into  
335 the state. Prior to 2016, mosquito surveillance in Iowa predominantly focused on West  
336 Nile virus [31], utilizing a trap network that was not ideal for the collection of invasive  
337 *Aedes* species and did not extend into areas that would most likely serve as points of  
338 introduction. In 2016, our initial surveillance efforts along Iowa’s southern border failed to  
339 detect *Ae. albopictus* [19], yet in hindsight, these predominantly agricultural and less  
340 densely populated areas did not represent ideal *Ae. albopictus* habitats. However, our  
341 trapping efforts in 2016 did include Lee County [19], where our more focused efforts  
342 described in this study from 2017-2020 did result in the detection of established  
343 populations of *Ae. albopictus*. This discrepancy is most likely due to differences in trap  
344 locations in Lee County when compared between 2016 and 2017-2020, which for 2016  
345 included only sites near Keokuk, while in 2017-2020 included both Keokuk and Ft.  
346 Madison. It is therefore of note that beginning in 2017 and in subsequent years, each of  
347 the trapping sites in Ft. Madison were positive for *Ae. albopictus*. Yet, for Keokuk which  
348 is ~16 miles away, the first detection of *Ae. albopictus* wasn’t until 2018. This includes at  
349 least one site with continual trapping efforts in 2016 [19] and 2017 for which *Ae. albopictus*  
350 was later detected in 2018. These intra-county differences suggest that the introduction  
351 of *Ae. albopictus* in Lee County likely occurred prior to 2017 for Ft. Madison, while the  
352 introduction into Keokuk is more recent, potentially even during the years of our study  
353 (2017-2020) and suggests that their distribution is continuing to expand in the county.  
354 Similar to Ft. Madison (Lee County), we believe that the detection of *Ae. albopictus* in  
355 Burlington (Des Moines County) occurred prior to our trapping efforts in 2017 based on  
356 their abundance and distribution throughout the city. However, previous surveillance  
357 efforts in Des Moines County have been limited, preventing the determination of a  
358 definitive timeline for their introduction. Based on the prevalence of multiple mtDNA  
359 haplotypes in Des Moines County, multiple invasion events may have contributed to the

360 established *Ae. albopictus* populations in the county. For both Des Moines and Lee  
361 counties, the proximity of the Mississippi River and interstate highways to the urban areas  
362 of both counties likely represents the most feasible route of introduction through freight  
363 and shipping along the waterway or from interstate transport from neighboring Illinois.

364 In contrast, the introduction of *Ae. albopictus* into Polk County, are inextricably tied to the  
365 tire transport industry. Due to the potential for yearly infestations, which may be  
366 responsible for previous detections of *Ae. albopictus* in the county [7,8,17], is difficult to  
367 definitively demonstrate that the populations of *Ae. albopictus* identified in Polk County  
368 are of established populations and not an annual infestation. Yet, during the course of our  
369 study (2017-2020), there is strong evidence that we may have captured a local infestation  
370 that was able to overwinter and establish in the area. Support for this includes an ~10-  
371 fold increase in the number of *Ae. albopictus* collected between 2017 and 2018 (35 and  
372 321 respectively), a dramatic increase in the percentage of *Ae. albopictus* in overall gravid  
373 *Aedes* trap yields (21% in 2017 compared to an average of 62% from 2018-2020), and  
374 the consistent detection of two predominant mtDNA haplotypes (*hap\_1* and *hap\_3*)  
375 between 2017 and 2018. Moreover, the recent detection of *Ae. albopictus* at low densities  
376 at other non-focused trapping sites in close proximity to the tire facility support their  
377 potential expansion and establishment in the area.

378 Together, our results provide strong evidence for the presence and establishment of *Ae.*  
379 *albopictus* populations in Iowa, demonstrating the further expansion of *Ae. albopictus* into  
380 the Upper Midwest region of the United States. Importantly, with consistent winter  
381 temperatures in Iowa that are below freezing, this challenges existing beliefs that these  
382 winter temperature extremes serve as the primary boundary for *Ae. albopictus*  
383 overwintering and expansion [18,39,40,42]. With the additional recent detection of *Ae.*  
384 *albopictus* in Wisconsin [15], this raises an increased need for continual surveillance to  
385 monitor the further spread and expansion of *Ae. albopictus* in the Upper Midwest and  
386 other regions of the world on the northern range of the expansion of *Ae. albopictus*.  
387 Through increased urbanization and predicted climate change, the distribution of *Ae.*  
388 *albopictus* is only expected to further spread [3], highlighting the increased risk of  
389 mosquito-borne disease transmission in new regions of the world.

## 390 **Acknowledgements**

391 We would like to thank Julie Coughlin of the Iowa Department of Public Health, the many  
392 local public health partners that contributed to our mosquito trapping efforts, especially to  
393 Christa Poggemiller of the Des Moines County Public Health Department and Michele  
394 Ross of the Lee County Health Department for leading these efforts. We would also like  
395 to thank those that enabled access to their properties to conduct mosquito trapping, Chris  
396 Lee for assistance in mosquito identifications, and to Chris Stone for discussions  
397 regarding the DNA haplotype analysis. This research was supported by the USDA  
398 National Institute of Food and Agriculture, Hatch Project 101071, the Epidemiology and  
399 Laboratory Capacity for Infectious Diseases (ELC) Program, and the Midwest Center of  
400 Excellence for Vector-Borne Disease. This publication was supported by Cooperative  
401 Agreement #U01 CK000505, funded by the Centers for Disease Control and Prevention.  
402 Its contents are solely the responsibility of the authors and do not necessarily represent  
403 the official views of the Centers of Disease Control and Prevention or the Department of  
404 Health and Human Services.

## 405   **References**

- 406    1.    Reiter P, Sprenger D. The used tire trade: a mechanism for the worldwide dispersal  
407       of container breeding mosquitoes. *J Am Mosq Control Assoc.* 1987;3: 494–501.
- 408    2.    Kraemer MUG, Sinka ME, Duda KA, Mylne A, Shearer FM, Brady OJ, et al. The  
409       global compendium of *Aedes aegypti* and *Ae. albopictus* occurrence. *Sci Data.*  
410       2015;2: 150035.
- 411    3.    Kraemer M, Reiner R, Brady O, Messina J, Gilbert M, Pigott D, et al. Past and future  
412       spread of the arbovirus vectors *Aedes aegypti* and *Aedes albopictus*. *Nat Microbiol.*  
413       2019;4: 854–863.
- 414    4.    Bonizzoni M, Gasperi G, Chen X, James AA. The invasive mosquito species *Aedes*  
415       *albopictus*: Current knowledge and future perspectives. *Trends Parasitol.* 2013;29:  
416       460–468.
- 417    5.    Sprenger D, Wuithiranyagool T. The discovery and distribution of *Aedes albopictus*  
418       in Harris County, Texas. *J Am Mosq Control Assoc.* 1986;2: 217–219.
- 419    6.    Yee DA. Thirty years of *Aedes albopictus* (Diptera: Culicidae) in America: An  
420       introduction to current perspectives and future challenges. *J Med Entomol.*  
421       2016;53: 989–991.
- 422    7.    Hahn MB, Eisen RJ, Eisen L, Boegler KA, Moore CG, McAllister J, et al. Reported  
423       distribution of *Aedes* (*Stegomyia*) *aegypti* and *Aedes* (*Stegomyia*) *albopictus* in the  
424       United States, 1995-2016 (Diptera: Culicidae). *J Med Entomol.* 2016;53: 1169–  
425       1175.
- 426    8.    Hahn MB, Eisen L, McAllister J, Savage HM, Mutebi J, Eisen RJ. Updated reported  
427       distribution of *Aedes* (*Stegomyia*) *aegypti* and *Aedes* (*Stegomyia*) *albopictus*  
428       (Diptera : Culicidae) in the United States, 1995 – 2016. 2017;54: 1420-1424.
- 429    9.    Egizi A, Healy SP, Fonseca DM. Rapid blood meal scoring in anthropophilic *Aedes*  
430       *albopictus* and application of PCR blocking to avoid pseudogenes. *Infect Genet*  
431       *Evol.* 2013;16: 122–128.



- 432 10. Paupy C, Delatte H, Bagny L, Corbel V, Fontenille D. *Aedes albopictus*, an  
433 arbovirus vector: From the darkness to the light. *Microbes Infect.* 2009;11: 1177–  
434 1185.
- 435 11. Grard G, Caron M, Mombo IM, Nkoghe D, Mboui Ondo S, Jiolle D, et al. Zika Virus  
436 in Gabon (Central Africa) - 2007: A New Threat from *Aedes albopictus*? *PLoS Negl*  
437 *Trop Dis.* 2014;8: e2681.
- 438 12. McKenzie BA, Wilson AE, Zohdy S. *Aedes albopictus* is a competent vector of Zika  
439 virus: A meta-analysis. *PLoS One.* 2019;14: e0216794.
- 440 13. Claborn DM, Poiry M, Famutimi OD, Duitsman D, Thompson KR. A survey of  
441 mosquitoes in southern and western missouri. *J Am Mosq Control Assoc.* 2018;34:  
442 131–133.
- 443 14. Janousek TE, Plagge J, Kramer WL. Record of *Aedes albopictus* in Nebraska with  
444 notes on its biology. *J Am Mosq Cont Control Assoc.* 2001;17: 265–267.
- 445 15. Richards T, Tucker BJ, Hassan H, Bron GM, Bartholomay L, Paskewitz S. First  
446 detection of *Aedes albopictus* (Diptera: Culicidae) and expansion of *Aedes*  
447 *japonicus japonicus* in Wisconsin, United States. *J Med Entomol.* 2019; 56:291-  
448 296.
- 449 16. Stone CM, Zuo Z, Li B, Ruiz M, Swanson J, Hunt J, et al. Spatial, temporal, and  
450 genetic invasion dynamics of *Aedes albopictus* (Diptera: Culicidae) in Illinois. *J Med*  
451 *Entomol.* 2020;57: 1488–1500.
- 452 17. Dunphy BM, Rowley WA, Bartholomay LC. A taxonomic checklist of the mosquitoes  
453 of Iowa. *J Am Mosq Control Assoc.* 2014;30: 119–121.
- 454 18. Johnson TL, Haque U, Monaghan AJ, Eisen L, Hahn MB, Hayden MH, et al.  
455 Modeling the environmental suitability for *Aedes* (*Stegomyia*) *aegypti* and *Aedes*  
456 (*Stegomyia*) *albopictus* (Diptera: Culicidae) in the contiguous United States. 2017;  
457 *J Med Entomol.* 2017;54: 1605–1614.
- 458 19. Kovach KB, Smith RC. Surveillance of mosquitoes (Diptera: Culicidae) in southern  
459 Iowa, 2016. *J Med Entomol.* 2018;55: 1341–1345.

- 460 20. Eiras AE, Buhagiar TS, Ritchie SA. Development of the Gravid Aedes Trap for the  
461 capture of adult female container-exploiting mosquitoes (Diptera: Culicidae). *J Med*  
462 *Entomol.* 2014;51: 200–209.
- 463 21. Maciel-de-Freitas R, Eiras AE, Lourenço-de-Oliveira R. Field evaluation of  
464 effectiveness of the BG-Sentinel, a new trap for capturing adult *Aedes aegypti*  
465 (Diptera: Culicidae). *Mem Inst Oswaldo Cruz.* 2006;101: 321–325.
- 466 22. Farajollahi A, Kesavaraju B, Price DC, Williams GM, Healy SP, Gaugler R, et al.  
467 Field efficacy of BG-Sentinel and industry-standard traps for *Aedes albopictus*  
468 (Diptera: Culicidae) and West Nile virus surveillance. *J Med Entomol.* 2009;46:  
469 919–25.
- 470 23. Meeraus WH, Armistead JS, Arias JR. Field comparison of novel and gold standard  
471 traps for collecting *Aedes albopictus* in Northern Virginia. *J Am Mosq Control*  
472 *Assoc.* 2008;24: 244–248.
- 473 24. Johnson BJ, Hurst T, Quoc HL, Unlu I, Freebairn C, Faraji A, et al. Field  
474 comparisons of the Gravid Aedes Trap (GAT) and BG-Sentinel Trap for monitoring  
475 *Aedes albopictus* (Diptera: Culicidae) populations and notes on indoor GAT  
476 collections in Vietnam. *J Med Entomol.* 2018;54: 340–348.
- 477 25. Darsie R, Ward R. Identification and geographical distribution of the mosquitoes of  
478 North America, North of Mexico. University Press of Florida; 2005.
- 479 26. Multi-Resolution Land Characteristics Consortium. NLCD 2016 Land Cover  
480 (CONUS).
- 481 27. Bonnet DD, Worcester DJ. The dispersal of *Aedes albopictus* in the territory of  
482 Hawaii. *Am J Trop Med Hyg.* 1946;26: 465–476.
- 483 28. Niebylski ML, Craig GB. Dispersal and survival of *Aedes albopictus* at a scrap tire  
484 yard in Missouri. *J Am Mosq Control Assoc.* 1994;10: 339–343.
- 485 29. Verdonschot PFM, Besse-Lototskaya AA. Flight distance of mosquitoes  
486 (Culicidae): A metadata analysis to support the management of barrier zones  
487 around rewetted and newly constructed wetlands. *Limnologica.* 2014;45: 69–79.

- 488 30. Post RJ, Flook PK, Millest AL. Methods for the preservation of insects for DNA  
489 studies. *Biochem Syst Ecol.* 1993;21: 85–92.
- 490 31. Dunphy BM, Kovach KB, Gehrke EJ, Field EN, Rowley WA, Bartholomay LC, et al.  
491 Long-term surveillance defines spatial and temporal patterns implicating *Culex*  
492 *tarsalis* as the primary vector of West Nile virus. *Sci Rep.* 2019;9: 6637.
- 493 32. Field EN, Gehrke EJ, Ruden RM, Adelman JS, Smith RC. An improved multiplex  
494 Polymerase Chain Reaction (PCR) assay for the identification of mosquito (Diptera:  
495 Culicidae) blood meals. *J Med Entomol.* 2020;57: 557–562.
- 496 33. Zhong D, Lo E, Hu R, Metzger ME, Cummings R, Bonizzoni M, et al. Genetic  
497 analysis of invasive *Aedes albopictus* populations in Los Angeles County, California  
498 and its potential public health impact. *PLoS One.* 2013;8: e68586.
- 499 34. Rozas J, Ferrer-Mata A, Sanchez-DelBarrio JC, Guirao-Rico S, Librado P, Ramos-  
500 Onsins SE, et al. DnaSP 6: DNA sequence polymorphism analysis of large data  
501 sets. *Mol Biol Evol.* 2017;34: 3299–3302.
- 502 35. Leigh J, Bryant D. POPART: full-feature software for haplotype network  
503 construction. *Methods Ecol. Evol.* 2015;6: 1110–1116.
- 504 36. Ogden R, Shuttleworth C, McEwing R, Cesarini S. Median-joining networks for  
505 inferring intraspecific phylogenies. *Conserv Genet.* 2005;6: 37–48.
- 506 37. Braks MAH, Honório NA, Lourenço-De-Oliveira R, Juliano SA, Lounibos LP.  
507 Convergent habitat segregation of *Aedes aegypti* and *Aedes albopictus* (Diptera:  
508 Culicidae) in southeastern Brazil and Florida. *J Med Entomol.* 2003;40: 785–794.
- 509 38. Delatte H, Toty C, Boyer S, Bouetard A, Bastien F, Fontenille D. Evidence of habitat  
510 structuring *Aedes albopictus* populations in Réunion Island. *PLoS Negl Trop Dis.*  
511 2013;7: e2111.
- 512 39. Lee EJ, Yang SC, Kim TK, Noh BE, Lee HS, Kim H, et al. Geographical Genetic  
513 variation and sources of Korean *Aedes albopictus* (Diptera: Culicidae) populations.  
514 *J Med Entomol.* 2020;57: 1057–1068.

- 515 40. Nawrocki SJ, Hawley WA. Estimation of the northern limits of distribution of *Aedes*  
516 *albopictus* in North America. J Am Mosq Control Assoc. 1987;3: 314–317.
- 517 41. Moore CG. *Aedes albopictus* in the United States: Current status and prospects for  
518 further spread. J Am Mosq Control Assoc. 1999;15: 221–227.
- 519 42. Armstrong PM, Andreadis TG, Shepard JJ, Thomas MC. Northern range expansion  
520 of the Asian tiger mosquito (*Aedes albopictus*): Analysis of mosquito data from  
521 Connecticut, USA. PLoS Negl Trop Dis. 2017;11: e0005623.
- 522 43. Rochlin I, Ninivaggi D V., Hutchinson ML, Farajollahi A. Climate change and range  
523 expansion of the Asian tiger mosquito (*Aedes albopictus*) in Northeastern USA:  
524 Implications for public health practitioners. PLoS One. 2013;8: e60874.
- 525 44. Zhao L, Lee X, Smith RB, Oleson K. Strong contributions of local background  
526 climate to urban heat islands. Nature. 2014;511: 216–219.
- 527 45. Yang J, Bou-Zeid E. Should cities embrace their heat islands as shields from  
528 extreme cold? J Appl Meteorol Climatol. 2018;57: 1309–1320.
- 529 46. Macintyre HL, Heaviside C, Cai X, Phalkey R. Comparing temperature-related  
530 mortality impacts of cool roofs in winter and summer in a highly urbanized European  
531 region for present and future climate. Environ Int. 2021;154.
- 532 47. Ward TB. Influence of an urban heat island on mosquito development and survey  
533 of biting midge species associated with white-tailed deer farms. Oklahoma State  
534 University. 2011.
- 535

536 **Figures**

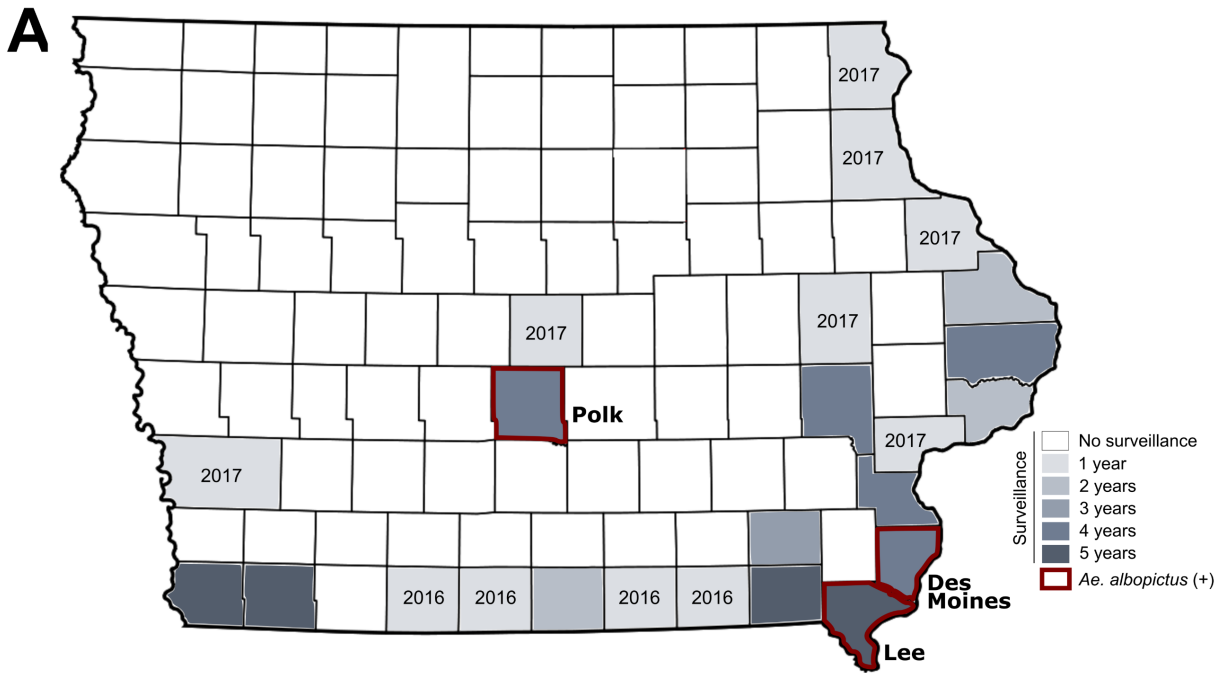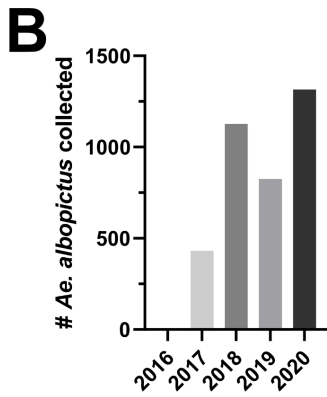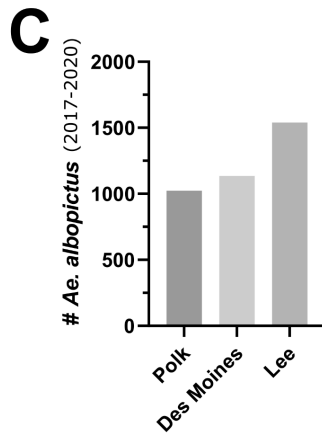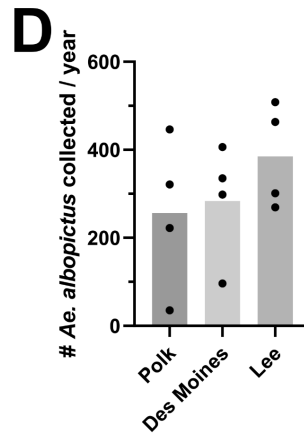

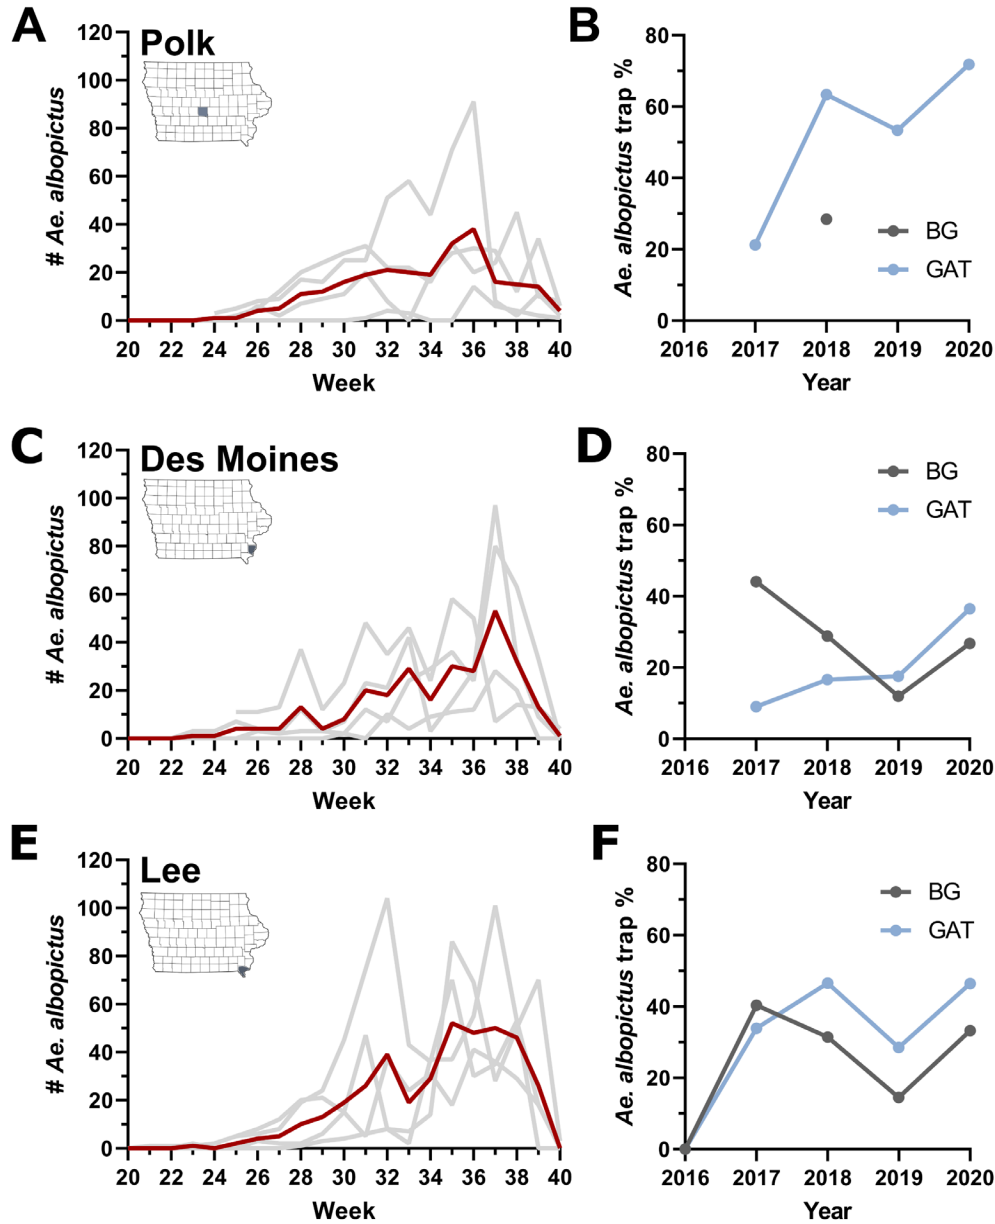

546

547 **Figure 2. Abundance of *Ae. albopictus* in each positive Iowa county.** The temporal  
548 abundance and percentage of *Ae. albopictus* in overall trap yields is displayed for Polk  
549 (A, B), Des Moines (C, D) and Lee County (E, F). Temporal abundance for each county  
550 (A, C, E) is displayed by epidemiological week, with the average abundance (2017-2020)  
551 displayed in red, while individual years are denoted by light gray lines. The percentage of  
552 *Ae. albopictus* collected of the total trap yields (B, D, F) are displayed for BG Sentinel  
553 (BG) and Gravid *Aedes* traps (GAT) for each year.

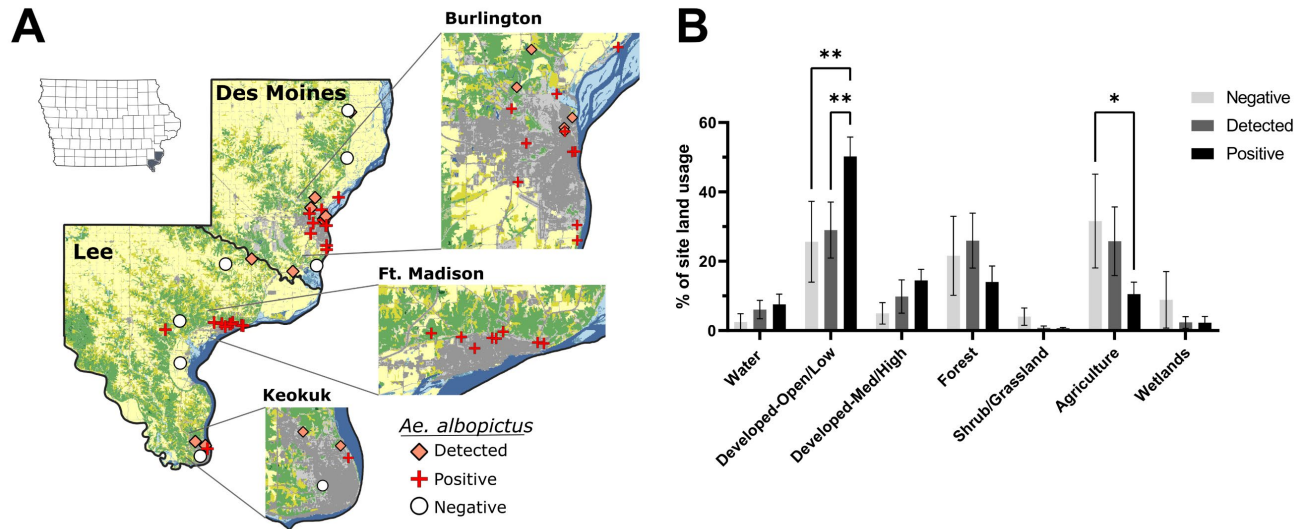

554

555 **Figure 3. Landscape ecology influences *Ae. albopictus* abundance.** Trapping site  
556 locations for both Des Moines and Lee counties display the presence/absence of *Ae.*  
557 *albopictus* as either positive (detected every year; red cross), detected (detected in some  
558 years; orange diamond), or negative (never detected; white circle) (**A**). Insets display  
559 expanded views for the most populous cities in Des Moines (Burlington) and Lee County  
560 (Ft. Madison and Keokuk). To better understand differences in the ecology of sites where  
561 *Ae. albopictus* were positive, detected, or negative, land use/land cover analysis was  
562 performed using 500m radius around each trapping location and displayed for different  
563 land use/land cover classifications (**B**). Statistical analysis was performed using a 2-way  
564 ANOVA and a Tukey's multiple comparison test using GraphPad Prism software.  
565 Asterisks denote significance (\* $p < 0.05$ ; \*\* $p < 0.01$ ).

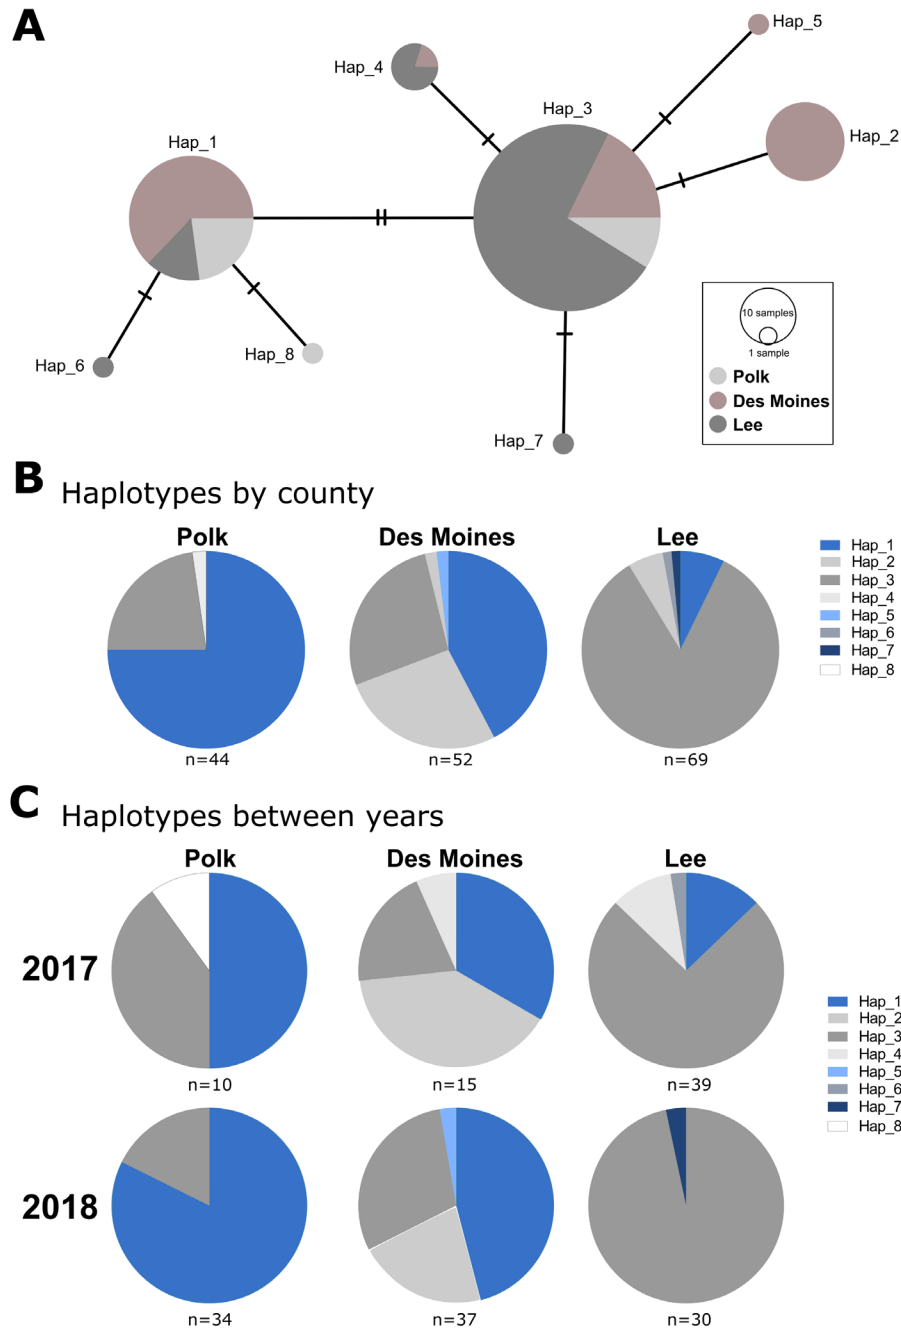

566 **Figure 4. Comparative analysis of *Ae. albopictus* mtDNA haplotypes identified in**  
567 **Iowa.** Comparisons of *Ae. albopictus* mtDNA haplotypes identified in Iowa are displayed  
568 as circles, with dashes on connecting lines indicating the number of nucleotide differences  
569 between haplotypes (A). Circle size corresponds to the number of individual samples,  
570 with differences in color representing the proportion samples from each respective  
571 county. Additional pie charts display differences in haplotypes between each *Ae.*  
572 *albopictus*- positive county (B) and the persistence of haplotypes between years (C).



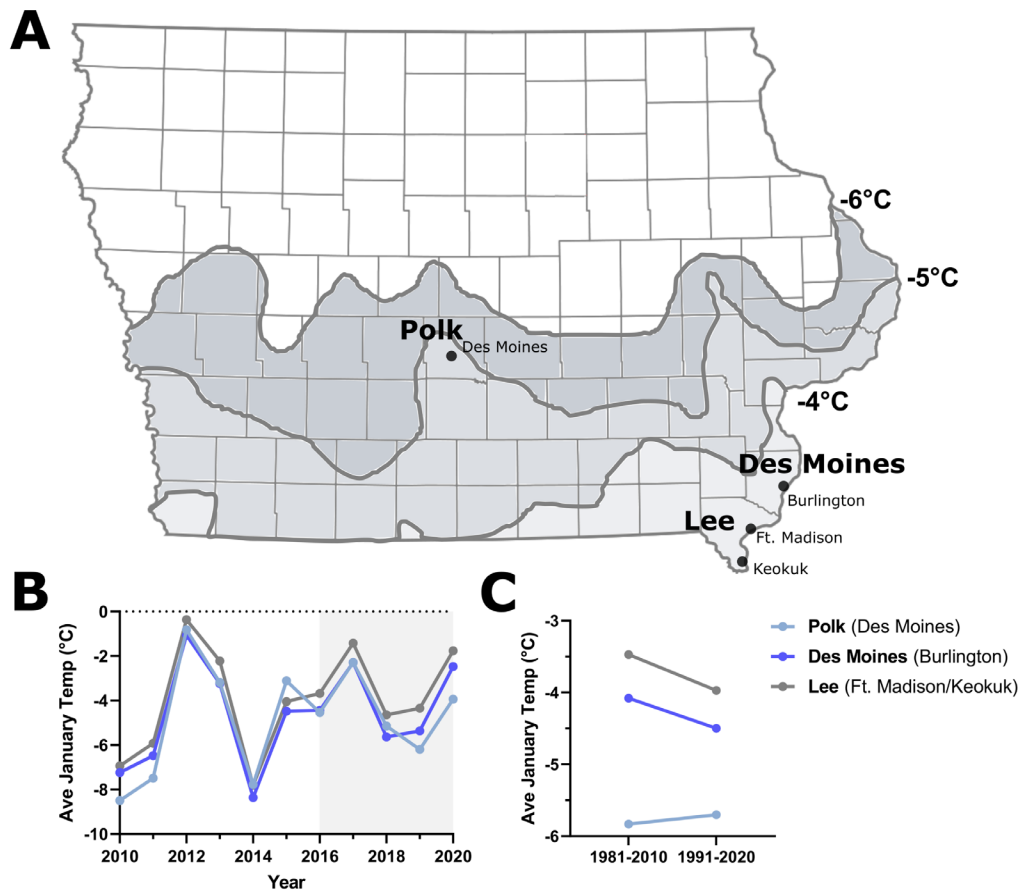

573 **Figure 5. Overwintering temperatures in Iowa.** Average winter (December, January,  
574 February) temperatures are displayed for Iowa (**A**). Shaded regions represent different  
575 temperature isotherms. Cities and counties where stable populations of *Ae. albopictus*  
576 have been detected are shown. Annual January temperatures are displayed from 2010-  
577 2020 to indicate differences in yearly temperatures for each respective *Ae. albopictus*-  
578 positive county (**B**). The shaded region from 2016-2020 represent the study period where  
579 targeted trapping efforts have focused on invasive *Aedes* species. Differences in January  
580 temperatures from the 30-year average from 1981-2010 and 1991-2020 examine the  
581 potential impacts of climate change on overwintering temperatures (**C**).
